# Supplementary material
Source: MDPI journal article supplement (https://www.mdpi.com/2073-4395/13/9/2273)
Supplement: s1 [file s1]

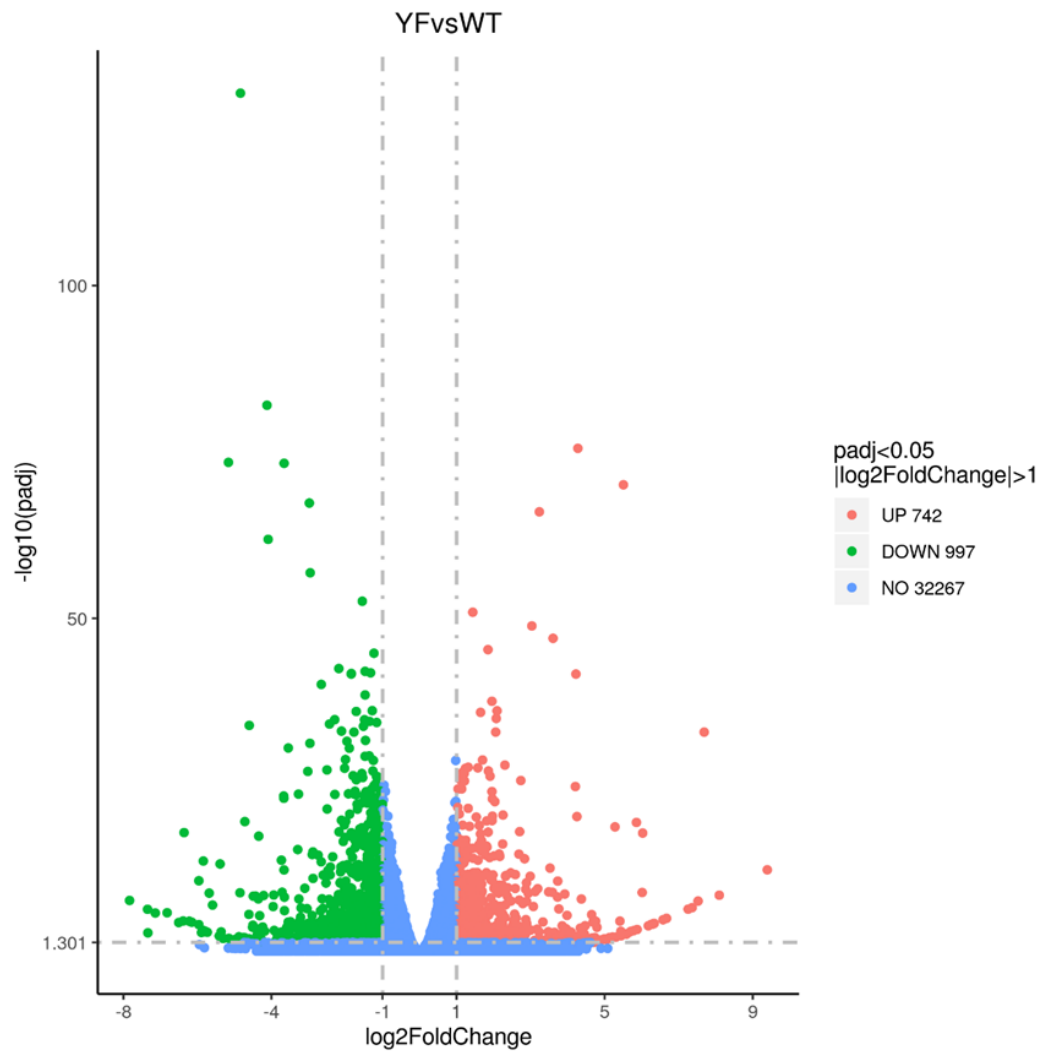

**Figure S1** Transcriptome differentially expressed genes (DEGs) between A03 and *ygl*. 742 DEGs were up-regulated and 997 DEGs were down-regulated.
